# Supplementary material
Source: Elsevier journal article supplement (https://www.sciencedirect.com/science/article/pii/S188558572500324X)
Supplement: mmc1 [file mmc1.pdf]

The type of provegetarian food pattern modifies long-term cardiovascular risk in young individuals

Supplementary data

Figure S1. Flowchart of study participants in the SUN cohort study.

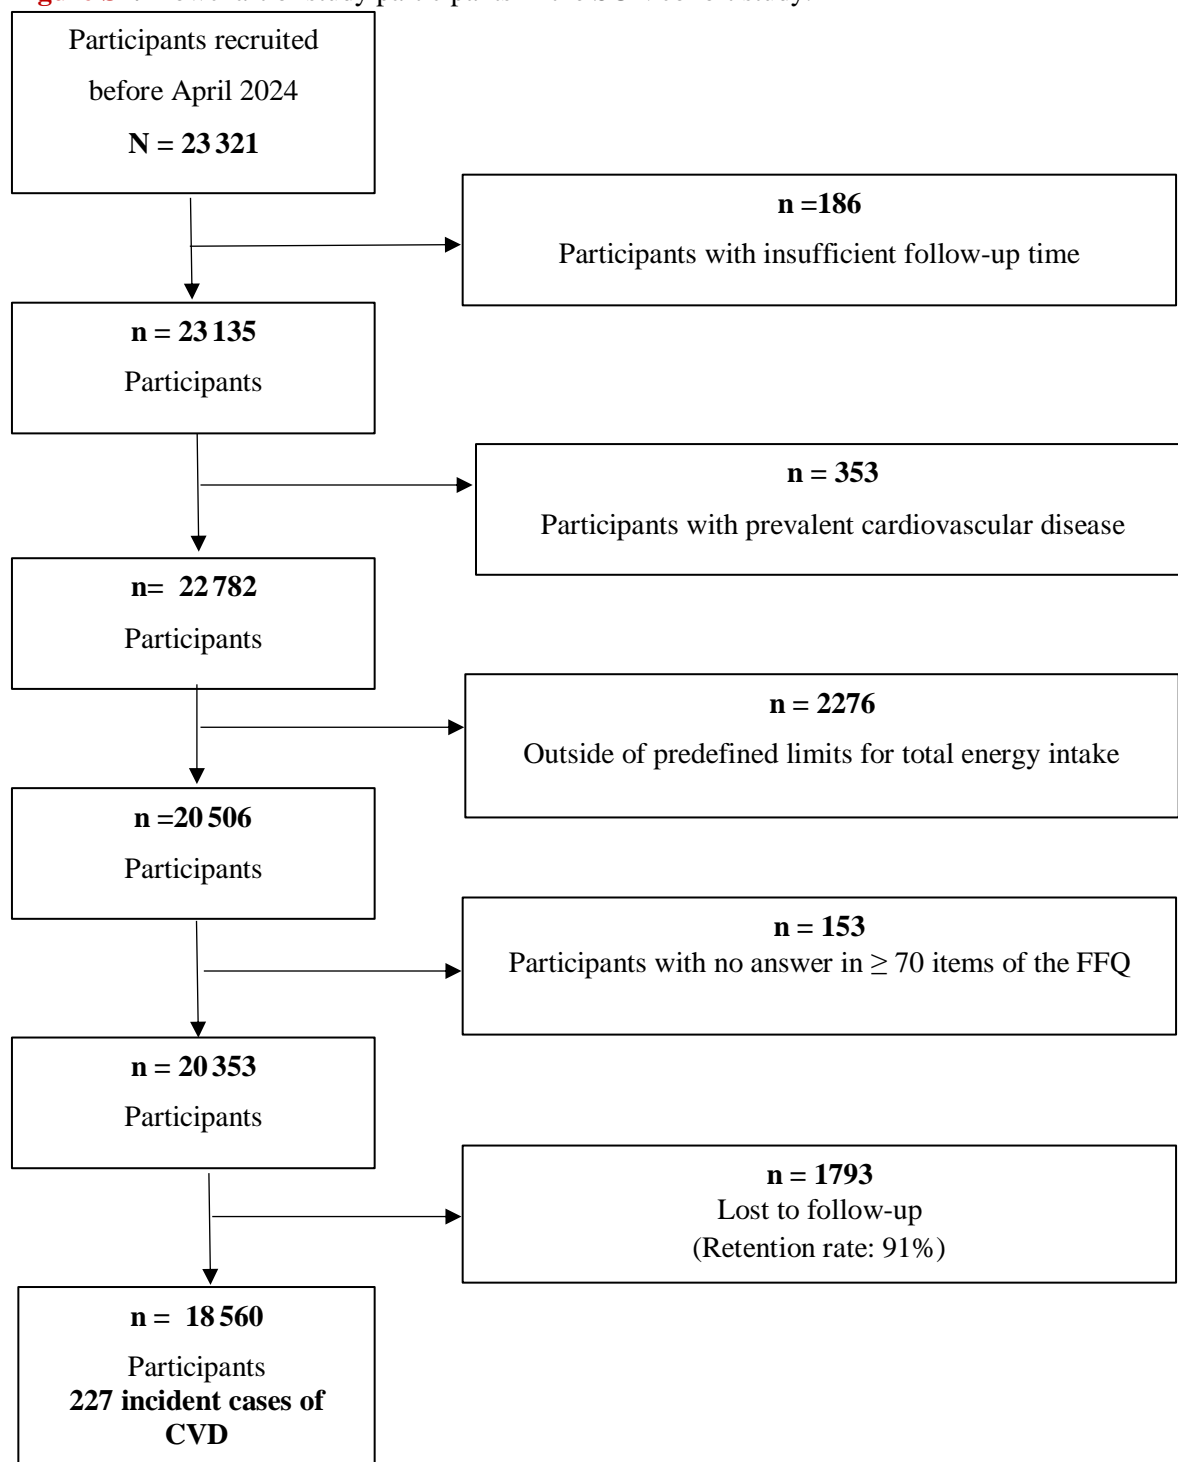

CVD, cardiovascular disease.

**Table S1**

Food groups included in the provegetarian (PVG) food pattern and scoring criteria for each food pattern (PVG, healthful PVG, and unhealthy PVG)

| Plant food groups            | Foods included in each food group                                                                                                                                       | PVG | hPVG | uPVG |
|------------------------------|-------------------------------------------------------------------------------------------------------------------------------------------------------------------------|-----|------|------|
| <i>Healthy</i>               |                                                                                                                                                                         |     |      |      |
| 1.Vegetables                 | Swiss chard, spinach, cabbage, cauliflower, broccoli, lettuce, chicory, tomatoes, carrot, pumpkin, green beans, eggplant, zucchini, cucumber, pepper, asparagus, others | +   | +    | -    |
| 2.Fruits                     | Citrus, grapes, banana, apple, pear, strawberry, peach, apricot, nectarine, cherries, plums, figs, melon, watermelon, grapes, mango, papaya, kiwi, olives, avocado      | +   | +    | -    |
| 3.Legumes                    | Lentils, chickpeas, beans, peas                                                                                                                                         | +   | +    | -    |
| 4.Nuts                       | Almonds, peanuts, hazelnuts, walnuts                                                                                                                                    | +   | +    | -    |
| 5.Olive oil                  | Olive oil                                                                                                                                                               | +   | +    | -    |
| 6.Whole grains               | Whole-grain bread                                                                                                                                                       | +   | +    | -    |
| 7.Boiled or baked potatoes   | Boiled or baked potatoes                                                                                                                                                | +   | +    | -    |
| 8.Coffee                     | Coffee, decaffeinated coffee                                                                                                                                            | +   | +    | -    |
| <i>Unhealthy</i>             |                                                                                                                                                                         |     |      |      |
| 9.Refined grains             | White bread, cold breakfast cereal, rice, pasta                                                                                                                         | +   | -    | +    |
| 10.French fries              | Potato chips, French fries                                                                                                                                              | +   | -    | +    |
| 11.Sugar-sweetened beverages | Carbonated beverages with sugar, low calorie carbonated beverages                                                                                                       | +   | -    | +    |
| 12.Fruit juices              | Fresh orange juice, other natural fruit juices and bottled fruit or vegetable juices                                                                                    | +   | -    | +    |

|                           |                                                                                                                                                                                                                 |     |      |      |
|---------------------------|-----------------------------------------------------------------------------------------------------------------------------------------------------------------------------------------------------------------|-----|------|------|
| 13.Pastries               | Cookies, home-baked and ready-made cakes, muffins, donuts, croissant, cakes, churros, chocolates, nougat, marzipan                                                                                              | +   | -    | +    |
| Animal food groups        |                                                                                                                                                                                                                 | PVG | hPVG | uPVG |
| 14.Dairy products         | Skimmed milk, semi-skimmed milk, whole milk, condensed milk, cream, whole fat yogurt, low fat yogurt, ice cream, milkshakes, curd, cottage or white cheese, cheese in portions, custard, curd                   | -   | -    | -    |
| 15.Meat and meat products | Chicken, turkey beef, veal, pork, lamb, liver, other viscera, serrano ham, cooked ham, spicy pork sausage, salami, mortadella, foie gras, black pudding, hamburger, other cured or smoked meats, bacon, hot dog | -   | -    | -    |
| 16.Fish or seafood        | White fish, oily fish, salted or smoked fish, clams, mussels, shrimp, squid, octopus                                                                                                                            | -   | -    | -    |
| 17.Eggs                   | Eggs                                                                                                                                                                                                            | -   | -    | -    |
| 18.Animal fats            | Butter, lard                                                                                                                                                                                                    | -   | -    | -    |
| 19.Miscellaneous food     | Instant soups, mayonnaise, croquettes, pasties                                                                                                                                                                  | -   | -    | -    |

hPVG, healthful provegetarian; PVG, provegetarian; uPVG: unhealthful provegetarian; +: positive score; -: reverse score.

**Table S2**

Macronutrient intake and food consumption of participants according to quartiles (Q) of the provegetarian (PVG), healthful provegetarian (hPVG), and unhealthy provegetarian (uPVG) food patterns in the SUN Project

| Variables                       | PVG           |                |                | hPVG          |               |                | uPVG           |                |               |
|---------------------------------|---------------|----------------|----------------|---------------|---------------|----------------|----------------|----------------|---------------|
|                                 | Q1            | Q2-Q3          | Q4             | Q1            | Q2-Q3         | Q4             | Q1             | Q2-Q3          | Q4            |
| <b>N</b>                        | 5268          | 8818           | 4474           | 5159          | 9293          | 4108           | 5123           | 9372           | 4065          |
| Provegetarian score range       | 29-53         | 54-61          | 62-80          | 33-52         | 53-62         | 63-87          | 31-52          | 53-62          | 63-86         |
| <b>Macronutrients (% E)</b>     |               |                |                |               |               |                |                |                |               |
| Carbohydrate intake (%E)        | 40.8<br>(7.2) | 43.6<br>(7.0)  | 46.8<br>(6.7)  | 42.8<br>(6.5) | 43.3<br>(7.3) | 45.1<br>(8.0)  | 41.3<br>(7.2)  | 43.6<br>(7.0)  | 46.5<br>(7.0) |
| Protein intake (%E)             | 18.8<br>(3.3) | 18.2<br>(3.0)  | 17.0<br>(2.7)  | 18.2<br>(2.9) | 18.3<br>(3.2) | 17.6<br>(3.1)  | 20.0<br>(3.0)  | 18.0<br>(2.8)  | 15.9<br>(2.4) |
| Fat intake (%E)                 | 38.5<br>(6.4) | 36.2<br>(6.2)  | 34.2<br>(6.1)  | 37.5<br>(5.7) | 36.4<br>(6.4) | 35.1<br>(7.2)  | 36.7<br>(6.5)  | 36.4<br>(6.5)  | 35.8<br>(6.5) |
| SFA (%E)                        | 14.3<br>(3.2) | 12.4<br>(2.8)  | 10.7<br>(2.6)  | 13.9<br>(2.9) | 12.5<br>(3.0) | 10.7<br>(3.0)  | 12.2<br>(3.1)  | 12.6<br>(3.1)  | 12.7<br>(3.2) |
| MUFA (%E)                       | 16.3<br>(3.5) | 15.7<br>(3.6)  | 15.4<br>(3.7)  | 15.6<br>(3.0) | 15.8<br>(3.7) | 16.0<br>(4.2)  | 16.4<br>(3.7)  | 15.8<br>(3.6)  | 15.1<br>(3.4) |
| PUFA (%E)                       | 5.4<br>(1.7)  | 5.2<br>(1.5)   | 5.1<br>(1.5)   | 5.5<br>(1.5)  | 5.2<br>(1.5)  | 5.1<br>(1.6)   | 5.0<br>(1.3)   | 5.2<br>(1.5)   | 5.5<br>(1.8)  |
| Trans fatty acid (%E)           | 0.4<br>(0.2)  | 0.4<br>(0.2)   | 0.3<br>(0.2)   | 0.4<br>(0.2)  | 0.4<br>(0.2)  | 0.3<br>(0.2)   | 0.3<br>(0.2)   | 0.4<br>(0.2)   | 0.4<br>(0.2)  |
| Total dietary fiber (g/d)       | 21.5<br>(9.4) | 23.4<br>(10.1) | 27.0<br>(11.0) | 18.0<br>(6.4) | 22.8<br>(8.2) | 32.8<br>(12.3) | 25.8<br>(10.4) | 23.1<br>(10.2) | 22.5<br>(9.9) |
| <b>Food consumption</b>         |               |                |                |               |               |                |                |                |               |
| <b>Plant- based food groups</b> |               |                |                |               |               |                |                |                |               |
| Vegetables (g/d)                | 482<br>(330)  | 545<br>(359)   | 638<br>(355)   | 384<br>(223)  | 542<br>(307)  | 774<br>(456)   | 680<br>(351)   | 534<br>(346)   | 420<br>(321)  |
| Fruits (g/d)                    | 365<br>(328)  | 427<br>(331)   | 520<br>(360)   | 283<br>(199)  | 415<br>(291)  | 657<br>(456)   | 496<br>(315)   | 423<br>(343)   | 372<br>(359)  |
| Legumes (g/d)                   | 23<br>(21)    | 23<br>(18)     | 26<br>(17)     | 19<br>(13)    | 24<br>(18)    | 29<br>(24)     | 27<br>(19)     | 23<br>(18)     | 21<br>(19)    |

|                                              |              |              |              |              |              |              |              |              |              |
|----------------------------------------------|--------------|--------------|--------------|--------------|--------------|--------------|--------------|--------------|--------------|
| Nuts (g/d)                                   | 6<br>(12)    | 8<br>(13)    | 11<br>(15)   | 4<br>(6)     | 7<br>(11)    | 16<br>(21)   | 10<br>(15)   | 8<br>(13)    | 6<br>(11)    |
| Olive oil (g/d)                              | 18<br>(16)   | 19<br>(15)   | 22<br>(15)   | 14<br>(12)   | 19<br>(15)   | 26<br>(17)   | 21<br>(15)   | 19<br>(16)   | 18<br>(16)   |
| Whole grains<br>(g/d)                        | 9<br>(32)    | 14<br>(33)   | 20<br>(35)   | 4.6<br>(15)  | 12<br>(29)   | 31<br>(48)   | 22<br>(38)   | 13<br>(32)   | 7.2<br>(26)  |
| Refined grains<br>(g/d)                      | 99<br>(80)   | 92<br>(70)   | 92<br>(62)   | 100<br>(68)  | 93<br>(72)   | 88<br>(73)   | 64<br>(47)   | 92<br>(64)   | 135<br>(90)  |
| Boiled or baked<br>potatoes (g/d)            | 24<br>(28)   | 29<br>(30)   | 36<br>(34)   | 22<br>(24)   | 29<br>(29)   | 39<br>(39)   | 34<br>(31)   | 29<br>(32)   | 25<br>(28)   |
| French<br>fries (g/d)                        | 30<br>(35)   | 26<br>(30)   | 25<br>(28)   | 37<br>(34)   | 26<br>(30)   | 18<br>(26)   | 15<br>(19)   | 26<br>(28)   | 45<br>(40)   |
| Coffee<br>(servings/d)                       | 1.3<br>(1.3) | 1.5<br>(1.3) | 1.7<br>(1.3) | 1.2<br>(1.2) | 1.5<br>(1.3) | 1.8<br>(1.4) | 1.7<br>(1.3) | 1.4<br>(1.3) | 1.2<br>(1.3) |
| Sugar sweetened<br>beverages<br>(servings/d) | 0.3<br>(0.7) | 0.3<br>(0.6) | 0.3<br>(0.6) | 0.5<br>(0.7) | 0.3<br>(0.6) | 0.2<br>(0.5) | 0.2<br>(0.5) | 0.3<br>(0.6) | 0.5<br>(0.8) |
| Fruit juices<br>(servings/d)                 | 0.4<br>(0.6) | 0.5<br>(0.7) | 0.6<br>(0.7) | 0.5<br>(0.6) | 0.4<br>(0.6) | 0.5<br>(0.8) | 0.3<br>(0.4) | 0.5<br>(0.6) | 0.6<br>(0.8) |
| Pastries (g/d)                               | 61<br>(55)   | 52<br>(46)   | 48<br>(40)   | 66<br>(48)   | 52<br>(48)   | 42<br>(43)   | 31<br>(26)   | 51<br>(39)   | 87<br>(65)   |
| <b>Animal food groups</b>                    |              |              |              |              |              |              |              |              |              |
| Dairy products<br>(g/d)                      | 558<br>(300) | 427<br>(243) | 323<br>(202) | 478<br>(255) | 432<br>(266) | 406<br>(273) | 446<br>(262) | 437<br>(268) | 434<br>(266) |
| Meat and meat<br>products (g/d)              | 230<br>(89)  | 178<br>(69)  | 139<br>(63)  | 207<br>(79)  | 181<br>(79)  | 158<br>(81)  | 182<br>(78)  | 182<br>(82)  | 188<br>(84)  |
| Fish or seafood<br>(g/d)                     | 110<br>(71)  | 100<br>(57)  | 92<br>(58)   | 94<br>(54)   | 100<br>(61)  | 111<br>(71)  | 122<br>(63)  | 99<br>(63)   | 80<br>(48)   |
| Eggs (g/d)                                   | 30<br>(20)   | 23<br>(14)   | 18<br>(12)   | 28<br>(18)   | 23<br>(15)   | 20<br>(14)   | 25<br>(15)   | 24<br>(17)   | 23<br>(17)   |
| Animal fats<br>(g/d)                         | 1.7<br>(3.5) | 1.0<br>(2.5) | 0.6<br>(1.8) | 1.7<br>(3.2) | 1.0<br>(2.7) | 0.6<br>(2.1) | 1.1<br>(2.6) | 1.1<br>(2.7) | 1.1<br>(3.0) |
| Miscellaneous<br>food* (g/d)                 | 50<br>(58)   | 33<br>(39)   | 23<br>(31)   | 49<br>(48)   | 34<br>(46)   | 22<br>(31)   | 32<br>(39)   | 36<br>(46)   | 39<br>(38)   |

PVG, provegetarian; hPVG, healthful provegetarian; uPVG, unhealthful provegetarian; SFA, saturated fatty acids; MUFA, monounsaturated fatty acids; PUFA, polyunsaturated fatty acids; %E: % of total energy intake.  
 \*Miscellaneous foods: croquettes, pasties, instant soups and mayonnaise.

**Table S3**

Pearson correlation coefficients between each provegetarian (PVG) food pattern and Mediterranean diet

|         | MedDiet | PVG   | hPVG  | uPVG |
|---------|---------|-------|-------|------|
| MedDiet | 1.00    |       |       |      |
| PVG     | 0.40    | 1.00  |       |      |
| hPVG    | 0.54    | 0.57  | 1.00  |      |
| uPVG    | -0.29   | -0.07 | -0.49 | 1.00 |

hPVG, healthful provegetarian; PVG, provegetarian; uPVG, unhealthful provegetarian.

$P < 0.05$  for all correlation coefficients
